# Supplementary material
Source: Springer Nature journal article supplement (https://www.springermedizin.de/resource/supplementary/13601_2012_280_MOESM3_ESM.pdf/9677798)

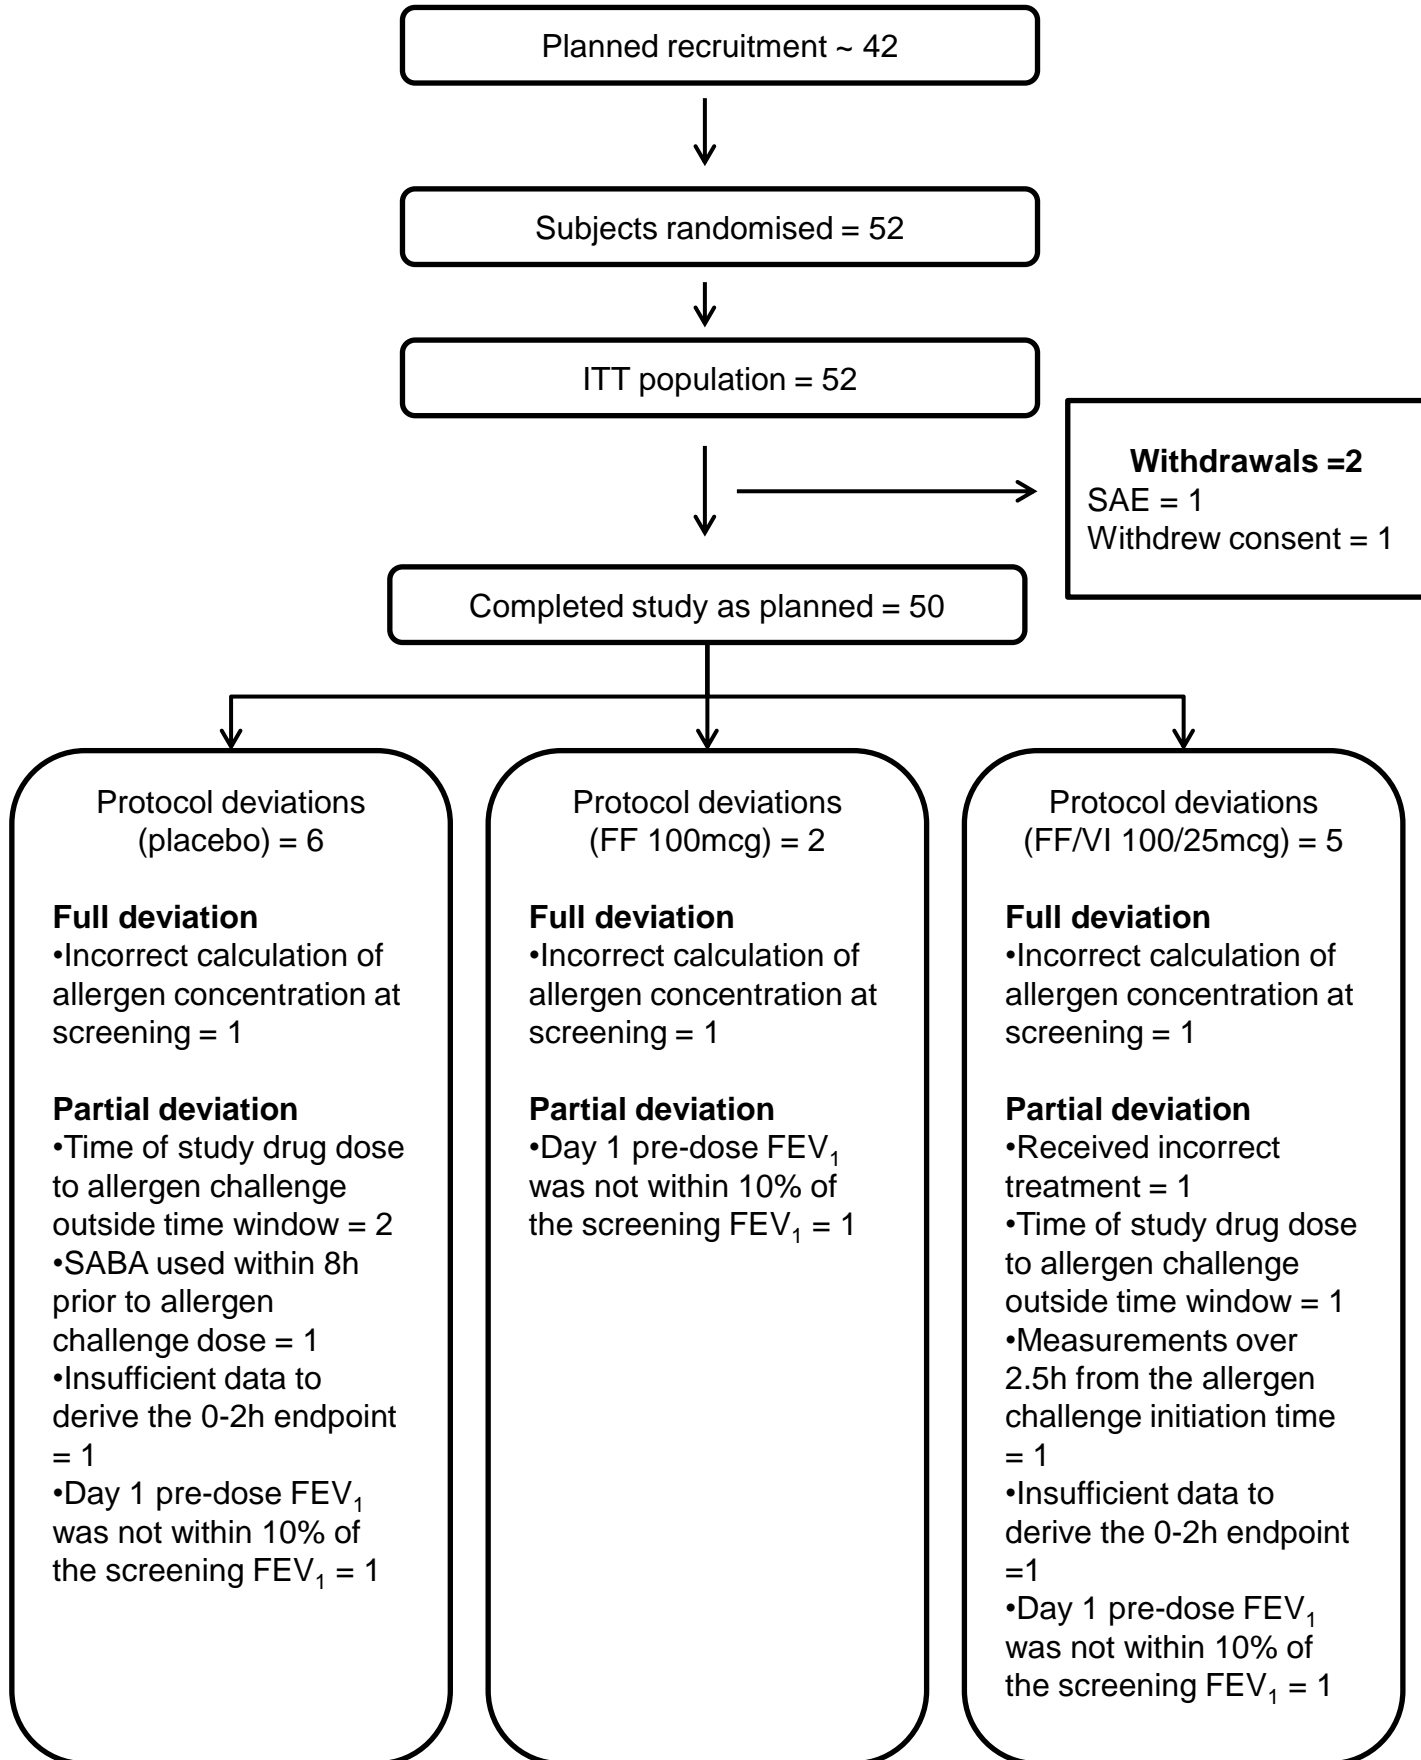

Note: A subject may have more than one protocol deviation.

Supplement: MOESM3 [file 9677798]
